# Supplementary material for: A novel RNA sequencing‐based miRNA signature predicts with recurrence and outcome of hepatocellular carcinoma
Source: PubMed Central journal article supplement (PMC6026871; doi:10.1002/1878-0261.12315), 2018-05-21
Supplement: MOL2-12-1125-s001.pdf [file MOL2-12-1125-s001.pdf]

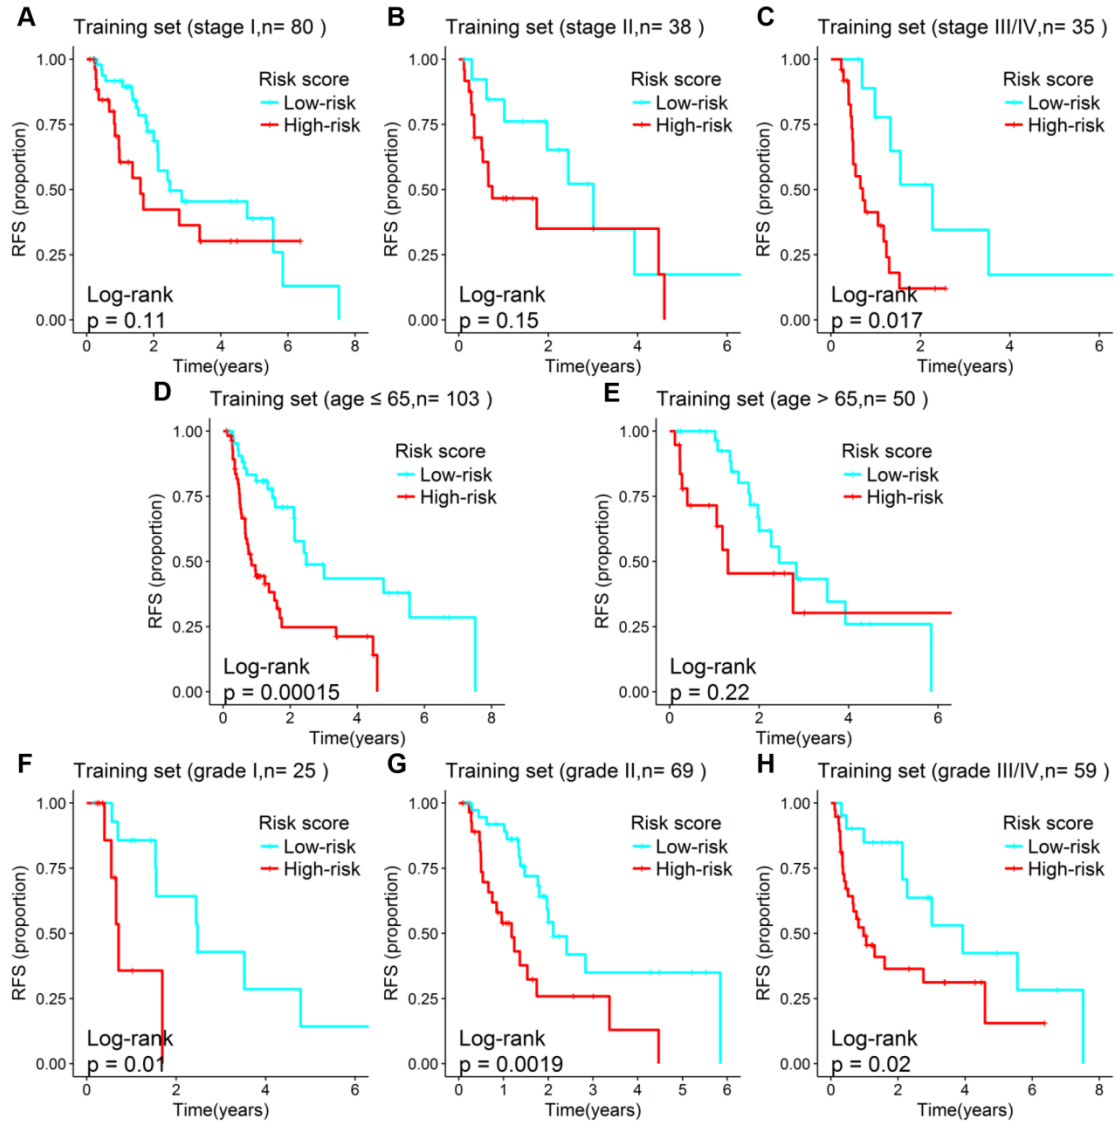

**Fig. S1: Survival analysis of HCC patients in the training set stratified by stage, age and tumor grade.** Survival analysis compared recurrence-free survival (RFS) by recurrence risk (high vs. low) stratified by clinical characteristics. Kaplan-Meier curves for patients with stage I HCC (n=80) (A), patients with stage II HCC (n=38) (B), patients with stage III/IV HCC (n=35) (C), patients aged 65 years or younger (n=103) (D), patients aged older than 65 years (n=50) (E), patients with grade I tumor (n=25) (F), patients with grade II tumor (n=69) (G), patients with grade III/IV tumor (n=59) (H). The “+” symbols in the panel indicate censored data.

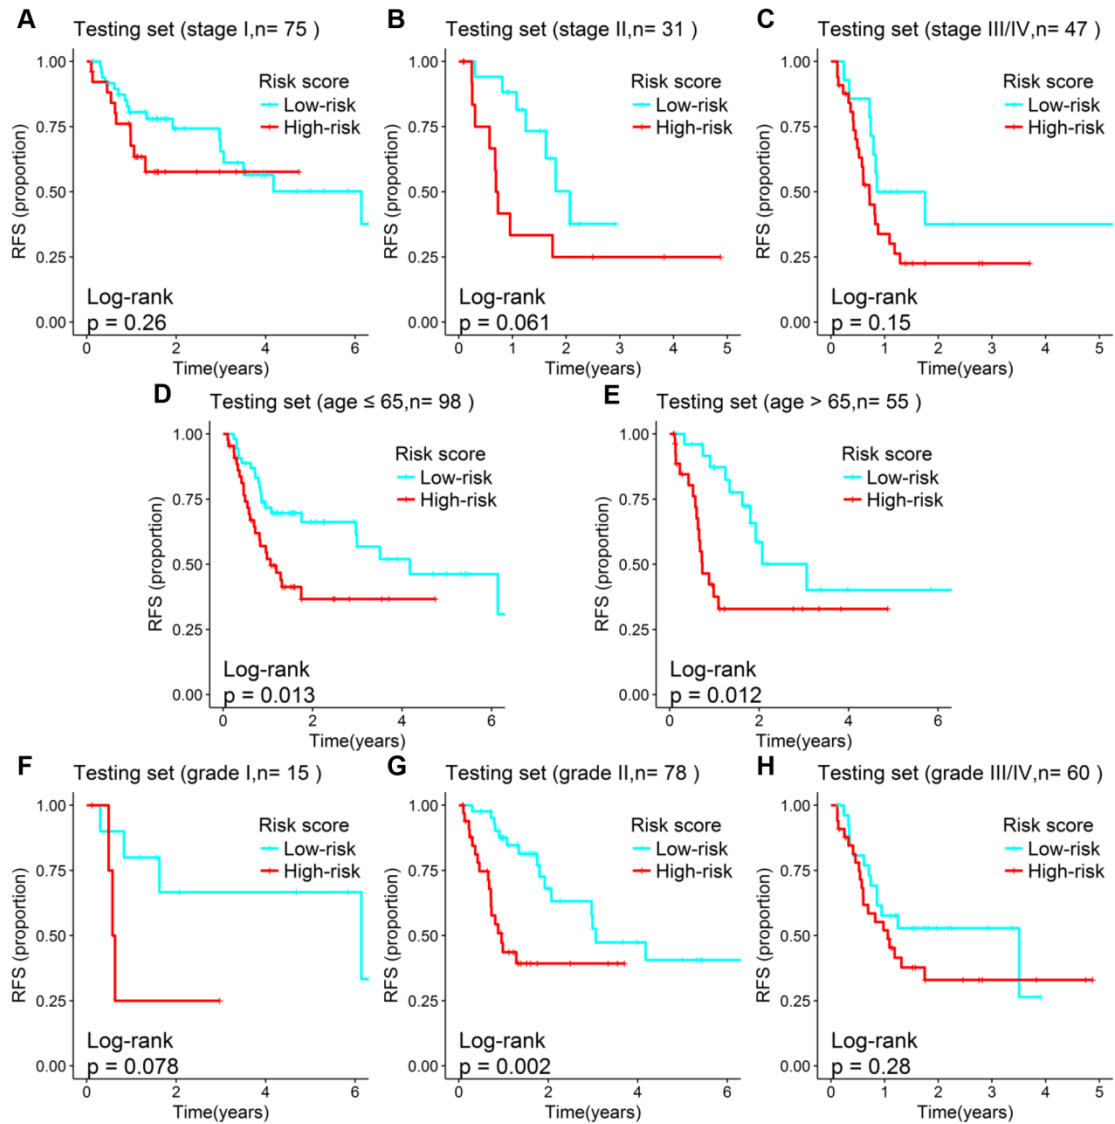

**Fig. S2: Survival analysis of HCC patients in the testing set stratified by stage, age and tumor grade.** Survival analysis compared recurrence-free survival (RFS) by recurrence risk (high vs. low) stratified by clinical characteristics. Kaplan-Meier curves for patients with stage I HCC (n=75) (A), patients with stage II HCC (n=31) (B), patients with stage III/IV HCC (n=47) (C), patients aged 65 years or younger (n=98) (D), patients aged older than 65 years (n=55) (E), patients with grade I tumor (n=15) (F), patients with grade II tumor (n=78) (G), patients with grade III/IV tumor (n=60) (H). The “+” symbols in the panel indicate censored data.

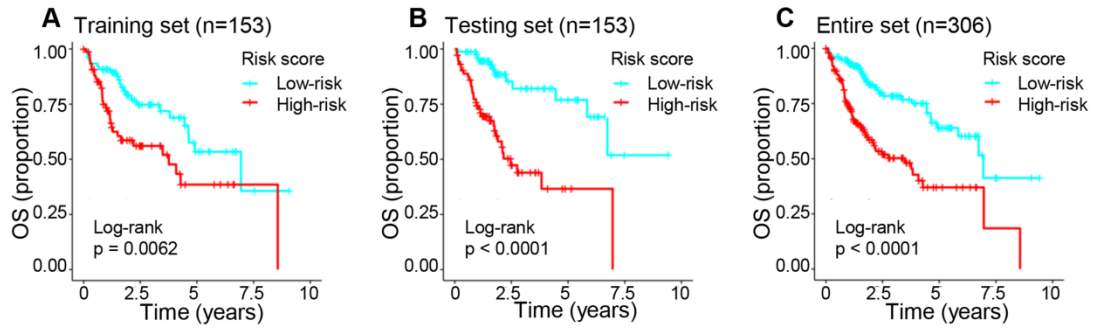

**Fig. S3: Association between six-miRNA signature and OS of HCC patients in different sets.** Kaplan-Meier curves of OS between high- and low-risk patients in training set (A), testing set (B), and entire TCGA set (C). The “+” symbols in the panel indicate censored data.

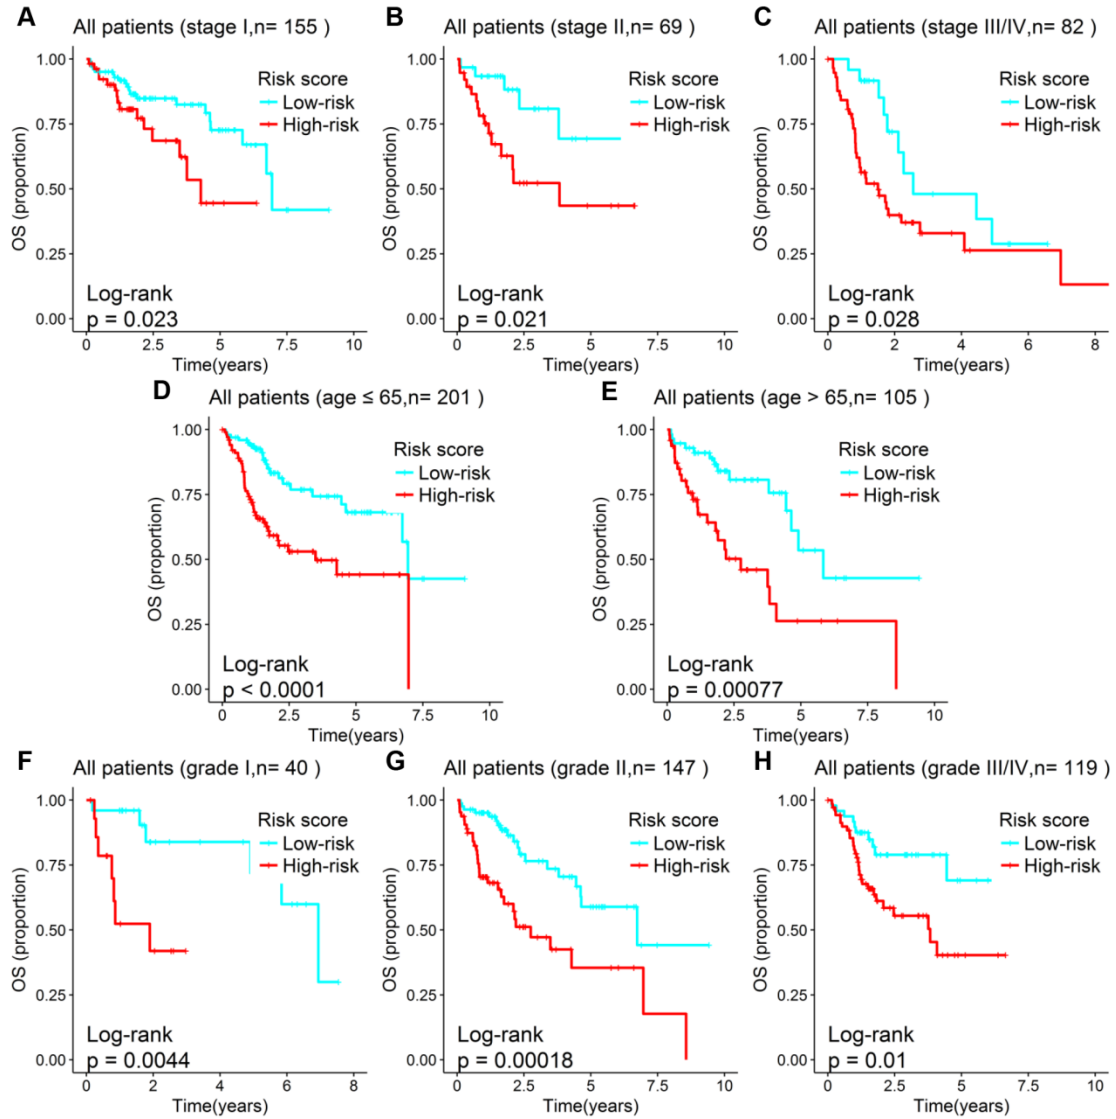

**Fig. S4: Stratified analysis of association between six-miRNA signature and OS of all HCC patients.** Kaplan-Meier curves for patients with stage I HCC (n=155) (A), patients with stage II HCC (n=69) (B), patients with stage III/IV HCC (n=82) (C), patients aged 65 years or younger (n=201) (D), patients aged older than 65 years (n=105) (E), patients with grade I tumor (n=40) (F), patients with grade II tumor (n=147) (G), patients with grade III/IV tumor (n=119) (H). The “+” symbols in the panel indicate censored data.

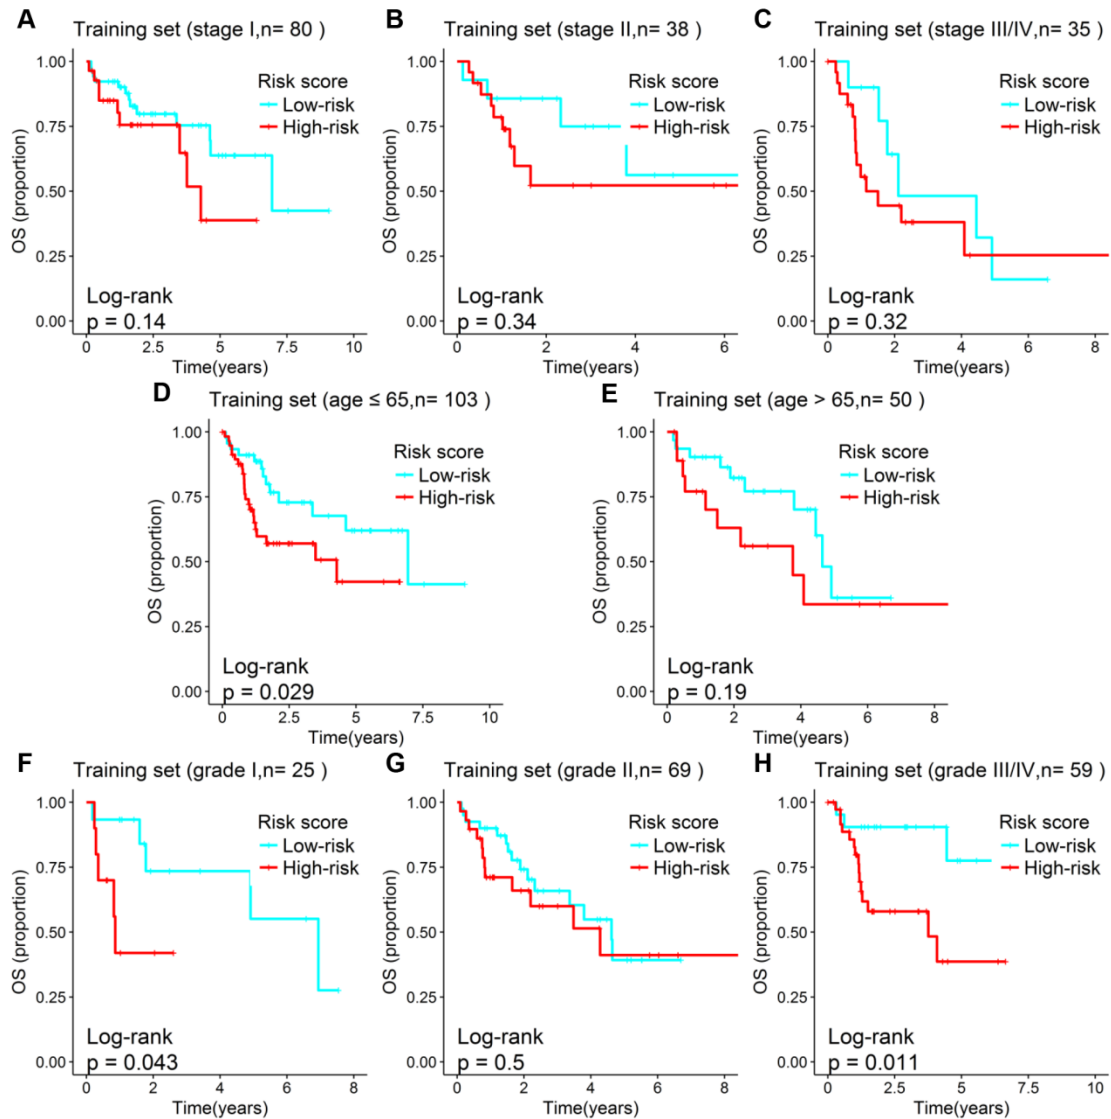

**Fig. S5: Stratified analysis of association between six-miRNA signature and OS of HCC patients in the training set.** Kaplan-Meier curves for patients with stage I HCC (n=80) (**A**), patients with stage II HCC (n=38) (**B**), patients with stage III/IV HCC (n=35) (**C**), patients aged 65 years or younger (n=103) (**D**), patients aged older than 65 years (n=50) (**E**), patients with grade I tumor (n=25) (**F**), patients with grade II tumor (n=69) (**G**), patients with grade III/IV tumor (n=59) (**H**). The “+” symbols in the panel indicate censored data.

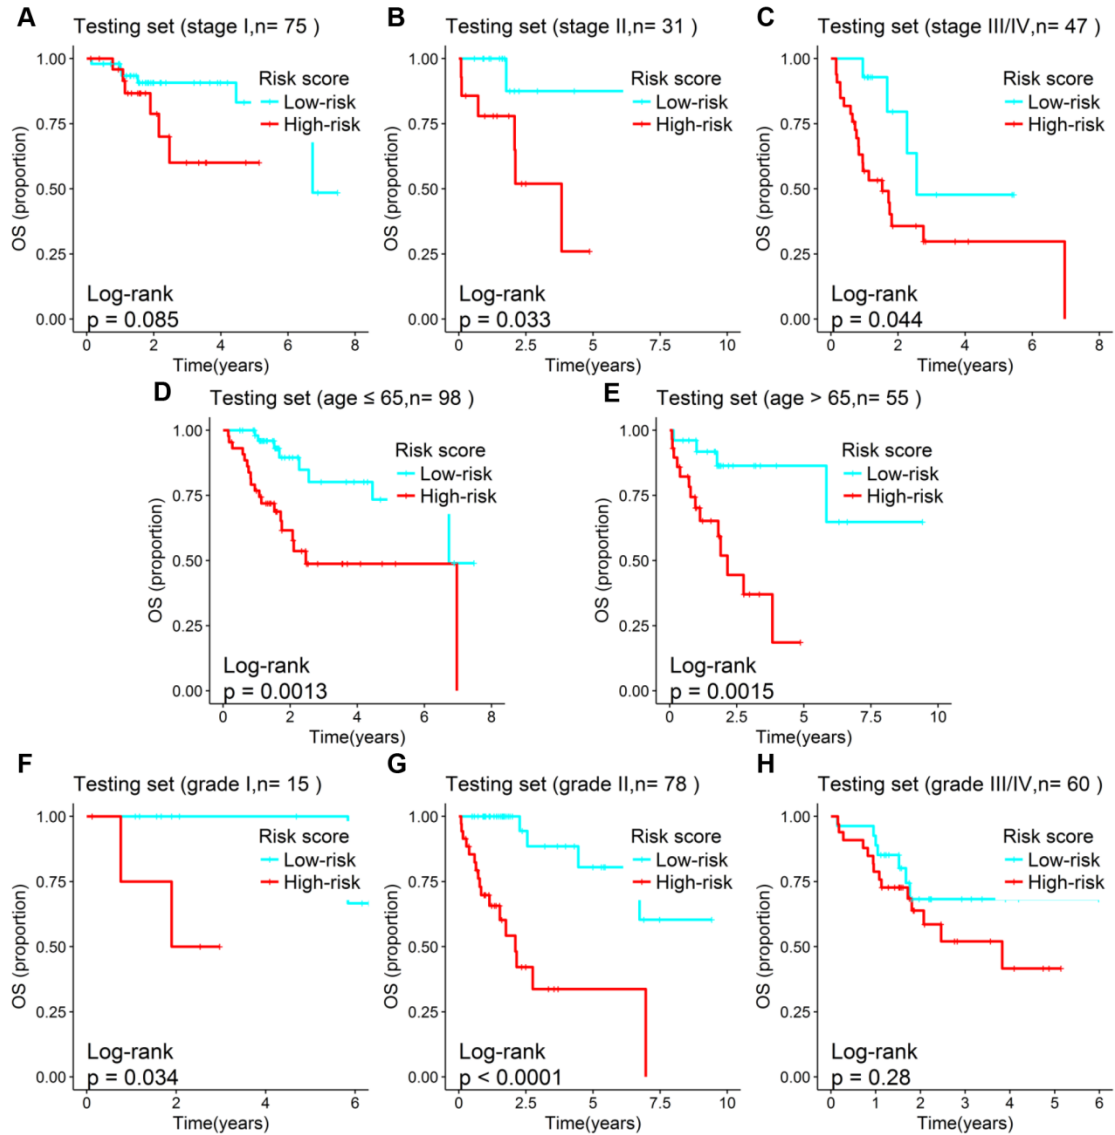

**Fig. S6: Stratified analysis of association between six-miRNA signature and OS of HCC patients in the testing set.** Kaplan-Meier curves for patients with stage I HCC (n=75) (A), patients with stage II HCC (n=31) (B), patients with stage III/IV HCC (n=47) (C), patients aged 65 years or younger (n=98) (D), patients aged older than 65 years (n=55) (E), patients with grade I tumor (n=15) (F), patients with grade II tumor (n=78) (G), patients with grade III/IV tumor (n=60) (H). The “+” symbols in the panel indicate censored data.

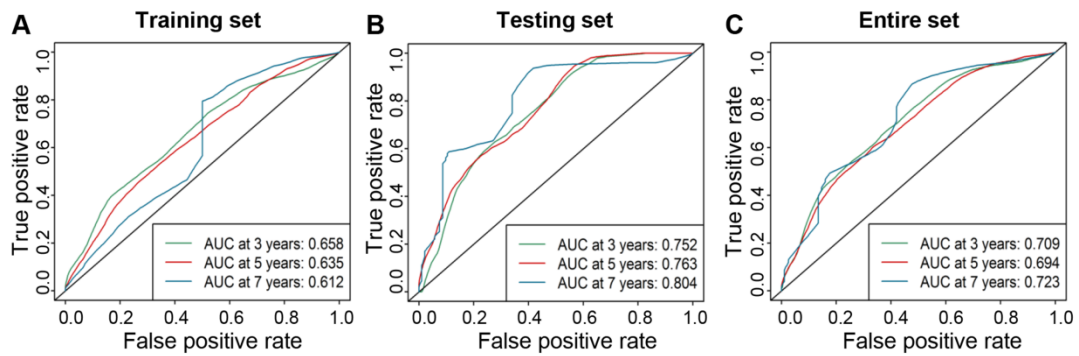

**Fig. S7: Performance assessment of the six-miRNA signature by survival ROC analysis.** Receiver operating characteristic (ROC) analysis of the six-miRNA signature for prediction of overall survival (OS) at 3, 5, and 7 years in the training set (A), the testing set (B), and the entire set (C).

**Table S1. Baseline demographic and clinical features of HCC patients in training and testing set**

| <b>Characteristic</b>          | <b>Training set<br/>(n=153)</b> | <b>Testing set<br/>(n=153)</b> | <b>p-value</b>     |
|--------------------------------|---------------------------------|--------------------------------|--------------------|
| <b>Sex</b>                     |                                 |                                | 0.901 <sup>a</sup> |
|                                | Male                            | 108                            | 106                |
|                                | Female                          | 45                             | 47                 |
| <b>Age, years (mean±SD)</b>    | 58.8 ±13.0                      | 58.6±12.8                      | 0.884 <sup>b</sup> |
| <b>Tumor stage</b>             |                                 |                                | 0.42 <sup>a</sup>  |
|                                | Stage I                         | 80                             | 75                 |
|                                | Stage II                        | 38                             | 31                 |
|                                | Stage III                       | 33                             | 45                 |
|                                | Stage IV                        | 2                              | 2                  |
| <b>Tumor grade</b>             |                                 |                                | 0.321 <sup>a</sup> |
|                                | G I                             | 25                             | 15                 |
|                                | G II                            | 69                             | 78                 |
|                                | G III                           | 52                             | 55                 |
|                                | G IV                            | 7                              | 5                  |
| <b>AJCC TNM staging system</b> |                                 |                                |                    |
| <b>T stage</b>                 |                                 |                                | 0.458 <sup>a</sup> |
|                                | T1                              | 80                             | 76                 |
|                                | T2                              | 39                             | 32                 |
|                                | T3                              | 29                             | 40                 |
|                                | T4                              | 5                              | 5                  |
| <b>N stage</b>                 |                                 |                                | 0.624 <sup>a</sup> |
|                                | N0                              | 113                            | 118                |
|                                | N1                              | 1                              | 2                  |
|                                | Nx                              | 39                             | 33                 |
| <b>M stage</b>                 |                                 |                                | 0.808 <sup>a</sup> |
|                                | M0                              | 120                            | 114                |
|                                | M1                              | 2                              | 2                  |
|                                | Mx                              | 31                             | 37                 |

<sup>a</sup>chi-square test; <sup>b</sup>Student *t*-test; SD: standard deviation

HCC, hepatocellular carcinoma; AJCC, American Joint Committee on Cancer

Tumor stage: AJCC pathological stage; Tumor grade: neoplasm histologic grade

T stage: tumor size; N stage: lymph node involvement; M stage: Metastasis status



**Table S2. Multivariable Cox regression analysis of OS in HCC patients in the training, testing, and entire sets**

| Characteristic              | Multivariable analysis |       |              |                   |
|-----------------------------|------------------------|-------|--------------|-------------------|
|                             |                        | HR    | 95% CI of HR | p-value           |
| <b>Training set (n=153)</b> |                        |       |              |                   |
| <b>Risk score</b>           |                        | 1.594 | 1.272-1.996  | <b>&lt;0.0001</b> |
| <b>Sex</b>                  | Female/Male            | 1.073 | 0.605-1.904  | 0.810             |
| <b>Age, years</b>           | ≥65 /<65               | 1.028 | 0.572-1.848  | 0.925             |
| <b>Tumor stage</b>          | III.IV/I.II            | 1.860 | 1.007-3.436  | 0.048             |
| <b>Tumor grade</b>          | III.IV/I.II            | 0.96  | 0.384-1.259  | 0.231             |
| <b>T stage</b>              | T3.T4/T1.T2            | NA    | NA           | NA                |
| <b>N stage</b>              | non-N0/N0              | 0.921 | 0.421-2.017  | 0.837             |
| <b>M stage</b>              | non-M0/M0              | 1.706 | 0.791-3.678  | 0.173             |
| <b>Testing set (n=153)</b>  |                        |       |              |                   |
| <b>Risk score</b>           |                        | 1.622 | 1.227~2.143  | <b>0.0006</b>     |
| <b>Sex</b>                  | Female/Male            | 0.950 | 0.496-1.819  | 0.878             |
| <b>Age, years</b>           | ≥65 /<65               | 1.364 | 0.711-2.616  | 0.350             |
| <b>Tumor stage</b>          | III.IV/I.II            | 0.641 | 0.074-5.551  | 0.687             |
| <b>Tumor grade</b>          | III.IV/I.II            | 1.122 | 0.569-2.210  | 0.740             |
| <b>T stage</b>              | T3.T4/T1.T2            | 5.508 | 0.604-50.258 | 0.130             |
| <b>N stage</b>              | non-N0/N0              | 1.442 | 0.649-3.203  | 0.369             |
| <b>M stage</b>              | non-M0/M0              | 2.062 | 0.973-4.370  | 0.059             |
| <b>Entire set (n=306)</b>   |                        |       |              |                   |
| <b>Risk score</b>           |                        | 1.646 | 1.393~1.945  | <b>&lt;0.0001</b> |
| <b>Sex</b>                  | Female/Male            | 0.998 | 0.658-1.512  | 0.991             |
| <b>Age, years</b>           | ≥65 /<65               | 1.110 | 0.734-1.677  | 0.622             |
| <b>Tumor stage</b>          | III.IV/I.II            | 0.599 | 0.076-7.749  | 0.627             |
| <b>Tumor grade</b>          | III.IV/I.II            | 0.860 | 0.556-1.331  | 0.500             |
| <b>T stage</b>              | T3.T4/T1.T2            | 4.011 | 0.500-32.137 | 0.191             |
| <b>N stage</b>              | non-N0/N0              | 1.206 | 0.703-2.701  | 0.496             |
| <b>M stage</b>              | non-M0/M0              | 1.740 | 1.033-2.932  | 0.037             |

HR, hazard ratio; CI, confidence interval

HCC, hepatocellular carcinoma; OS, overall survival

Tumor grade: neoplasm histologic grade; Tumor stage: AJCC pathological stage

T stage: tumor size; N stage: lymph node involvement; M stage: Metastasis status
